# Supplementary material for: Dialkylcyanamides are more reactive substrates toward metal-mediated nucleophilic addition than alkylcyanides
Source: Royal Society of Chemistry journal article supplement (doi:10.1039/c3dt51137e), 2013-01-01
Supplement: c3dt51137e.pdf [file c3dt51137e.pdf]

Supplementary information

**Table S1.** Crystal data, data collection, and structure refinement parameters for **1**.

|                                                                              |                                                     |
|------------------------------------------------------------------------------|-----------------------------------------------------|
| Complex                                                                      | <b>1</b>                                            |
| Formula                                                                      | C <sub>28</sub> H <sub>28</sub> ClN <sub>2</sub> Pt |
| Molecular weight                                                             | 724.93                                              |
| Crystal dimension, mm                                                        | 0.26×0.18× 0.10                                     |
| Crystal system                                                               | Monoclinic                                          |
| Space group                                                                  | <i>P</i> 2 <sub>1</sub> / <i>c</i>                  |
| <i>a</i> , Å                                                                 | 10.0799(4)                                          |
| <i>b</i> , Å                                                                 | 9.1672(4)                                           |
| <i>c</i> , Å                                                                 | 30.428(1)                                           |
| $\alpha$ , deg.                                                              | 90                                                  |
| $\beta$ , deg.                                                               | 93.080(1)                                           |
| $\gamma$ , deg.                                                              | 90                                                  |
| <i>V</i> , Å <sup>3</sup>                                                    | 2807.6(2)                                           |
| <i>Z</i>                                                                     | 4                                                   |
| <i>d</i> <sub>calc</sub> , g cm <sup>-3</sup>                                | 1.715                                               |
| $\theta$ <sub>max</sub> , deg.                                               | 28.0                                                |
| $\mu$ , cm <sup>-1</sup>                                                     | 53.60                                               |
| Transmission, <i>T</i> <sub>min</sub> / <i>T</i> <sub>max</sub>              | 0.411/0.616                                         |
| No. unique refls ( <i>R</i> <sub>int</sub> )                                 | 6724 (0.0264)                                       |
| No. obs. refls ( <i>I</i> >2σ( <i>I</i> ))                                   | 5559                                                |
| <i>R</i> <sub>1</sub> (on <i>F</i> for obs. refls) <sup>a</sup>              | 0.0363                                              |
| <i>wR</i> <sub>2</sub> (on <i>F</i> <sup>2</sup> for all refls) <sup>b</sup> | 0.0681                                              |
| <i>GOF</i>                                                                   | 1.079                                               |

<sup>a</sup>  $R_1 = \sum ||F_o| - |F_c|| / \sum |F_o|$

$$^b wR_2 = \{\sum[w(F_o^2 - F_c^2)^2]/\sum w(F_o^2)^2\}^{1/2}$$

**Preparation of Q[PtCl<sub>3</sub>(NCNMe<sub>2</sub>)] (Q = Me<sub>4</sub>N, Et<sub>4</sub>N).** QCl (0.025 mmol) was added to a solution of [PtCl<sub>2</sub>(NCNR<sub>2</sub>)<sub>2</sub>] (81 mg, 0.02 mmol) in MeNO<sub>2</sub> (0.5 mL) and the reaction mixture was refluxed. After 7 min it was cooled to RT and the complex formed was precipitated with toluene (ca. 10 mL). In each case, the precipitate was washed with Et<sub>2</sub>O (two 2 mL-portions). Yields were 79 mg, 89% (Q = Me<sub>4</sub>N), 68 mg, 68% (Q = Et<sub>4</sub>N).

**(NMe<sub>4</sub>)[PtCl<sub>3</sub>(NCNMe<sub>2</sub>)] (5).** Anal. Calcd for C<sub>28</sub>H<sub>28</sub>N<sub>2</sub>Cl<sub>3</sub>Pt: C, 20.31; H, 4.47; N, 9.62%. Found: C, 20.80; H, 4.95; N, 9.27%. HRESI<sup>+</sup>-MS, *m/z*: 370.9265 [PtCl<sub>3</sub>(NCNMe<sub>2</sub>)]<sup>+</sup> [370.9196 calcd.]. IR spectrum in KBr, selected bands, cm<sup>-1</sup>: 2293 s ν(C≡N). <sup>1</sup>H NMR in (CD<sub>3</sub>)<sub>2</sub>CO, δ: 2.97 (s, 6H, NCNCH<sub>3</sub>), 3.48 (s, 12H, NCH<sub>3</sub>). <sup>13</sup>C{<sup>1</sup>H} NMR was not recorded because of the poor solubility of **5** in the most common deuterated solvents.

**(NEt<sub>4</sub>)[PtCl<sub>3</sub>(NCNMe<sub>2</sub>)] (6).** Anal. Calcd for C<sub>11</sub>H<sub>26</sub>N<sub>3</sub>Cl<sub>3</sub>Pt: C, 26.33; H, 5.22; N, 8.37%. Found: C, 26.83; H, 5.38; N, 8.42%. HRESI<sup>+</sup>-MS, *m/z*: 130.1604 [NEt<sub>4</sub>]<sup>+</sup> [130.1596 calcd.]. HRESI<sup>+</sup>-MS, *m/z*: 370.9260 [PtCl<sub>3</sub>(NCNMe<sub>2</sub>)]<sup>+</sup> [370.9196 calcd.]. IR spectrum in KBr, selected bands, cm<sup>-1</sup>: 2297 s ν(C≡N). <sup>1</sup>H NMR in CD<sub>2</sub>Cl<sub>2</sub>, δ: 1.43 (t, <sup>3</sup>J<sub>HH</sub> 7.5 Hz, 12H, CH<sub>3</sub> from Et), 2.98 (s, 5.4H, NCH<sub>3</sub>), 3.51 (q, <sup>3</sup>J<sub>HH</sub> 7.5 Hz, 8H, NCH<sub>2</sub>). <sup>13</sup>C{<sup>1</sup>H} NMR in CD<sub>2</sub>Cl<sub>2</sub>, δ: 8.1 (CH<sub>3</sub> from Et), 40.2 (NCH<sub>3</sub>), 53.3 (NCH<sub>2</sub>); the NCN carbon was not detected.

**(Et<sub>4</sub>N)[PtCl<sub>3</sub>{N(CH<sub>2</sub>Ph)=C(H)Ph}] (15).** Anal. Calcd for C<sub>22</sub>H<sub>33</sub>N<sub>2</sub>Cl<sub>3</sub>Pt: C, 42.14; H, 5.31; N, 4.47%. Found: C, 42.55; H, 4.85; N, 4.26%. HRESI<sup>+</sup>-MS, *m/z*: 130.1584 [NEt<sub>4</sub>]<sup>+</sup> [130.1596 calcd.]. HRESI<sup>+</sup>-MS, *m/z*: 495.9759 [PtCl<sub>3</sub>{N(CH<sub>2</sub>Ph)=CHPh}]<sup>+</sup> [495.9713 calcd.]. <sup>1</sup>H NMR in CDCl<sub>3</sub>, δ: 1.38 (t, <sup>3</sup>J<sub>HH</sub> 7.5 Hz, 12H, CH<sub>3</sub> from Et), 5.33 and 5.41 (E and Z signals could not be discriminated by <sup>1</sup>H, <sup>1</sup>H-NOESY NMR method, E/Z ratio = 1:1, s+s, br, 2H, NCH<sub>2</sub>), 7.29–7.72 (m, 10H, Ph), 9.31 and 9.32 (s+s, 1H, N=CH).

Due to a low solubility of **5** in the most common organic solvents, compound **14** was only detected by NMR experiment and was not isolated from the reaction mixture.

**Identification of the products of nucleophilic addition of HON(CH<sub>2</sub>Ph)<sub>2</sub> to uncoordinated NCR** (R = NMe<sub>2</sub>, **20**; R = Ph, **21**; R = CH<sub>2</sub>Ph, **22**; NEt<sub>2</sub>, **23**; NC<sub>5</sub>H<sub>10</sub>, **24**; NC<sub>4</sub>H<sub>8</sub>O, **25**). **NHC(NMe<sub>2</sub>)ON(CH<sub>2</sub>Ph)<sub>2</sub> (20).** ESI<sup>+</sup>-MS, *m/z*: 266 [M – OH]<sup>+</sup> [266 calcd.], 306 [M + Na]<sup>+</sup> [306 calcd.]. <sup>1</sup>H NMR in C<sub>6</sub>D<sub>6</sub>, δ: 2.43 (s, 6H,

NMe), 3.67 (s, 4H, NCH<sub>2</sub>). **NHC(Ph)ON(CH<sub>2</sub>Ph)<sub>2</sub> (21)**. ESI<sup>+</sup>-MS, *m/z*: 339 [M + Na]<sup>+</sup> [339 calcd.]. <sup>1</sup>H NMR in C<sub>6</sub>D<sub>6</sub>, δ: 4.59 (s, 4H, NCH<sub>2</sub>), 8.36 and 8.39 (s+s, 1H, NH). **NHC(CH<sub>2</sub>Ph)ON(CH<sub>2</sub>Ph)<sub>2</sub> (22)**. ESI<sup>+</sup>-MS, *m/z*: 331 [M + H]<sup>+</sup> [331 calcd.], 353 [M + Na]<sup>+</sup> [353 calcd.]. <sup>1</sup>H NMR in C<sub>6</sub>D<sub>6</sub>, δ: 3.23 (s, 2H, CCH<sub>2</sub>), 4.70 (s, 4H, NCH<sub>2</sub>), 8.39 (s, 1H, NH).

**NHC(NEt<sub>2</sub>)ON(CH<sub>2</sub>Ph)<sub>2</sub> (23)**. ESI<sup>+</sup>-MS, *m/z*: 312 [M + H]<sup>+</sup> [312 calcd.], 334 [M + Na]<sup>+</sup> [334 calcd.]. <sup>1</sup>H NMR in C<sub>6</sub>D<sub>6</sub>, δ: 0.89 (t, <sup>3</sup>*J*<sub>HH</sub> 7.1 Hz, 6H, Me), 2.96 (q, <sup>3</sup>*J*<sub>HH</sub> 7.1 Hz, 4H, CH<sub>2</sub> from Et), 4.70 (s, 4H, ONCH<sub>2</sub>), 4.99 (s, br, 1H, NH), 6.9–7.9 (2m, 20H, Ph).

**NHC(NC<sub>5</sub>H<sub>10</sub>)ON(CH<sub>2</sub>Ph)<sub>2</sub> (24)**. ESI<sup>+</sup>-MS, *m/z*: 324 [M + H]<sup>+</sup> [324 calcd.], 346 [M + Na]<sup>+</sup> [346 calcd.]. <sup>1</sup>H NMR in C<sub>6</sub>D<sub>6</sub>, δ: 2.43 (s, 6H, NMe), 3.67 (s, 4H, NCH<sub>2</sub>). δ: 1.18–1.26 (m, 6H, β-CH<sub>2</sub> and γ-CH<sub>2</sub>), 3.00–3.08 (m, 4H, α-CH<sub>2</sub>), 3.85 (s, 4H, ONCH<sub>2</sub>), 4.61 (s, br, 1H, NH), 7.10–7.50 and 7.83–7.89 (2m, 20H, Ph).

**NHC(NC<sub>4</sub>H<sub>8</sub>O)ON(CH<sub>2</sub>Ph)<sub>2</sub> (25)**. ESI<sup>+</sup>-MS, *m/z*: 326 [M + H]<sup>+</sup> [326 calcd.], 348 [M + Na]<sup>+</sup> [348 calcd.]. <sup>1</sup>H NMR in C<sub>6</sub>D<sub>6</sub>, δ: 2.41 (t, <sup>3</sup>*J*<sub>HH</sub> 4.8 Hz, 4H, NCH<sub>2</sub> from NC<sub>4</sub>H<sub>8</sub>O), 3.04 (t, <sup>3</sup>*J*<sub>HH</sub> 4.8 Hz, 4H, OCH<sub>2</sub>), 3.87 (s, 4H, ONCH<sub>2</sub>), 4.74 (s, br, 1H, NH), 7.15–7.50 and 7.84–7.90 (2m, 20H, Ph).
